# Supplementary material for: Wearable Neck Surface Accelerometers for Occupational Vocal Health Monitoring: Instrument and Analysis Validation Study
Source: JMIR Form Res. 2022 Aug 5;6(8):e39789. doi: 10.2196/39789 (PMC9391979; doi:10.2196/39789)
Supplement: Multimedia Appendix 5 [file formative_v6i8e39789_app5.docx]

**Table S5. Post hoc testing results for the Rainbow Passage task.** t Ratios, P values and Cohen’s d effect sizes are presented for post hoc analyses of acoustic measures showing significant main effects of Time (CPP and Tilt) and Gender (f0). For main effects of Time, planned paired contrasts comparing scores at each time point against Day 1 (baseline) were conducted. For the main effect of Gender, Female values were compared against Male values. Statistically significant effects (P<.01) are indicated in **bold.**

| Time Points | CPP | | | Tilt | | |
| --- | --- | --- | --- | --- | --- | --- |
| *t* Ratio | Prob>|*t*| | Cohen's *d* | *t* Ratio | Prob>|*t*| | Cohen's *d* |
| Day 1 x Day 2 pre-session | -1.86 | .07 | 0.70 | -1.29 | .20 | 0.33 |
| Day 1 x Day 2 mid-session | -3.71 | **<.001** | 1.26 | -3.38 | **<.001** | 0.86 |
| Day 1 x Day 2 post-session | -2.35 | .02 | 1.06 | -2.22 | .03 | 0.75 |
| Day 1 x Day 3 | -0.23 | .82 | 0.27 | 0.87 | .39 | 0.33 |
| Day 1 x Day 4 | 0.07 | .94 | 0.08 | 1.28 | .20 | 0.60 |
|  | | | | | | |
| Gender | *f0* | | | - | | |
| *t* Ratio | Prob>|*t*| | Cohen's *d* |
| Female x Male | 5.83 | **<.001** | 3.07 |
